# Supplementary material for: Luminescence sensing, DFT, extraction and monitoring of Cr3+ and Al3+via the application of first derivative fluorescence spectroscopy
Source: Royal Society of Chemistry journal article supplement (doi:10.1039/d0nj01029d), 2020-01-01
Supplement: d0nj01029d1.pdf [file d0nj01029d1.pdf]

## Supplementary Material (ESI) for New Journal of Chemistry

### Luminescent sensing, DFT, extraction and monitoring of Cr<sup>3+</sup> and Al<sup>3+</sup> via the application of first derivative fluorescence spectroscopy

**Soma Mukherjee <sup>a\*</sup>, Soumi Betal <sup>a</sup>, Asoke Prasun Chattopadhyay <sup>b</sup>**

<sup>a</sup> Department of Environmental Science, University of Kalyani

<sup>b</sup> Department of Chemistry, University of Kalyani

Kalyani, Nadia – 741235, West Bengal, India

*Email:* [somam580@gmail.com](mailto:somam580@gmail.com)

Fax: 033-25828282; Phone: 033-25828750 Ext. 291, 292

### Contents

1. <sup>1</sup>H NMR spectra of L in DMSO-*d*<sub>6</sub>.
2. <sup>13</sup>C NMR spectra of L in DMSO-*d*<sub>6</sub>.
3. IR spectra of L.
4. Mass Spectra of L.
5. IR spectra of L-Cr<sup>3+</sup>.
6. Mass Spectra of L-Cr<sup>3+</sup>.
7. IR spectra of L-Al<sup>3+</sup>.
8. Mass Spectra of L-Al<sup>3+</sup>.
9. Job's plot of (a) L-Al<sup>3+</sup> (b) L-Cr<sup>3+</sup>.
10. Effect of emission L upon addition of water (0.0-50.0% in DMSO).
11. Solvent effects (DCM, DMSO, CH<sub>3</sub>OH, DMSO/H<sub>2</sub>O (1:1)) of L.
12. Fluorescence titration ( $\lambda_{\text{ex}}$ , 340.0 nm) of L ( $1.0 \times 10^{-7}$  M) upon addition of various amounts of (a) Fe<sup>3+</sup> ions (0.5 equiv.) in DMSO.
13. FTIR spectra of (a) L, (b) L-Al<sup>3+</sup>, (c) L-Cr<sup>3+</sup>.
14. Optimized structure of L.
15. Frontier molecular orbitals of L.
16. Optimised structure of (a) L-Al<sup>3+</sup> and (b) L-Cr<sup>3+</sup>.
17. Frontier molecular orbitals of L-Al<sup>3+</sup>.
18. Frontier molecular orbitals of L-Cr<sup>3+</sup>.
19. pH effects on absorbance values of (a) L-Al<sup>3+</sup> and (b) L-Cr<sup>3+</sup>.

Fig. S1  $^1\text{H}$  NMR spectra of L in  $\text{DMSO-}d_6$ .

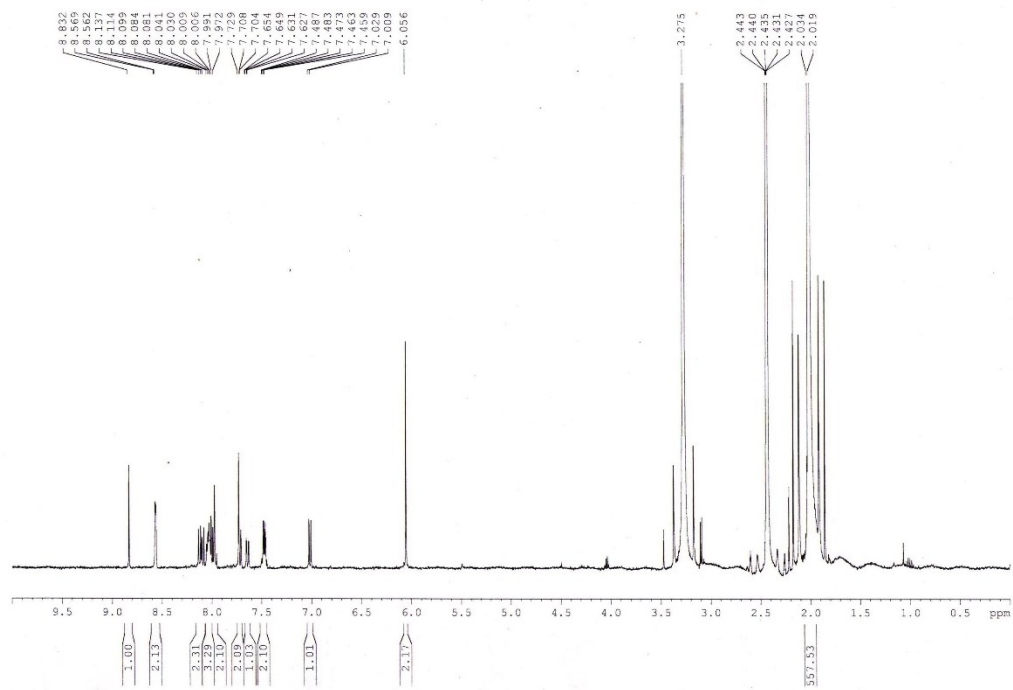

Fig. S2  $^{13}\text{C}$  NMR spectra of L in  $\text{DMSO-}d_6$ .

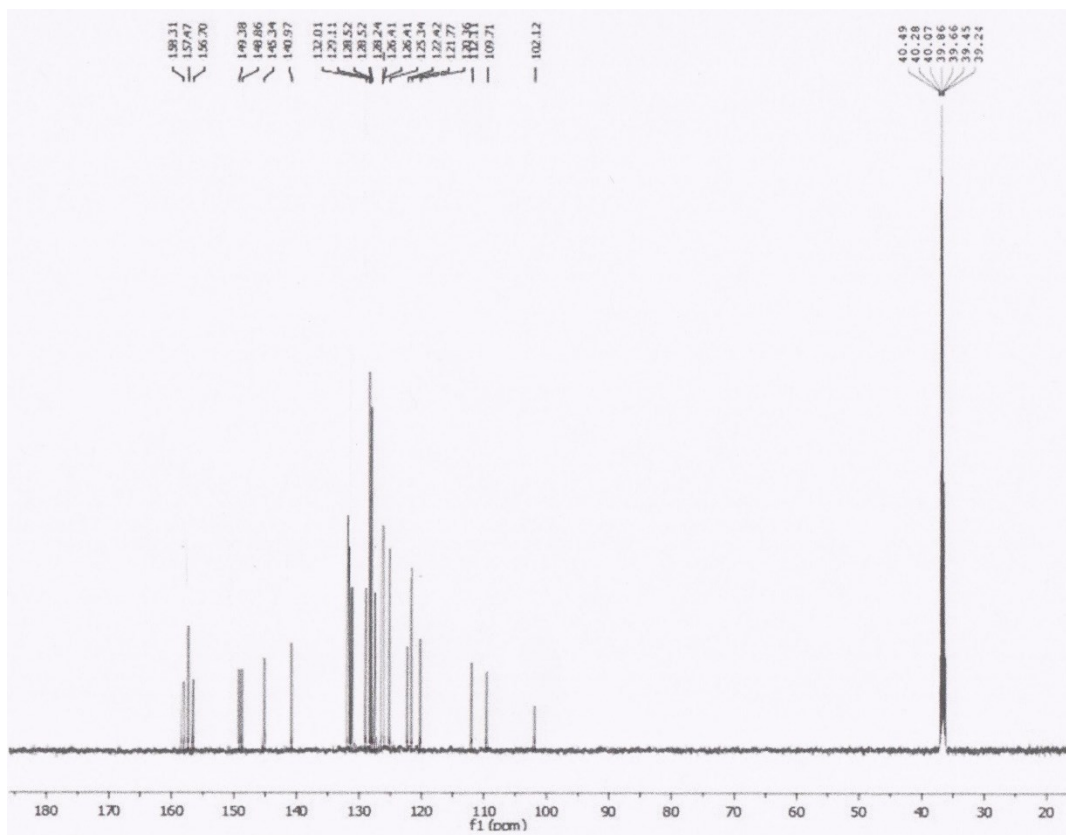

**Fig. S3** IR spectra of L.

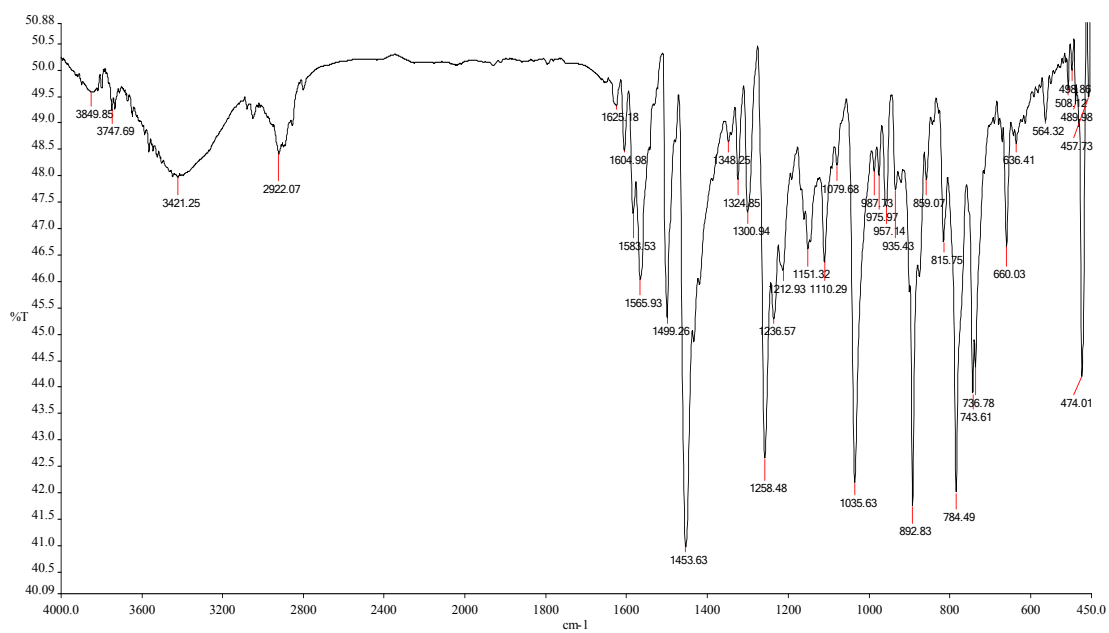

**Fig. S4** Mass Spectra of L.

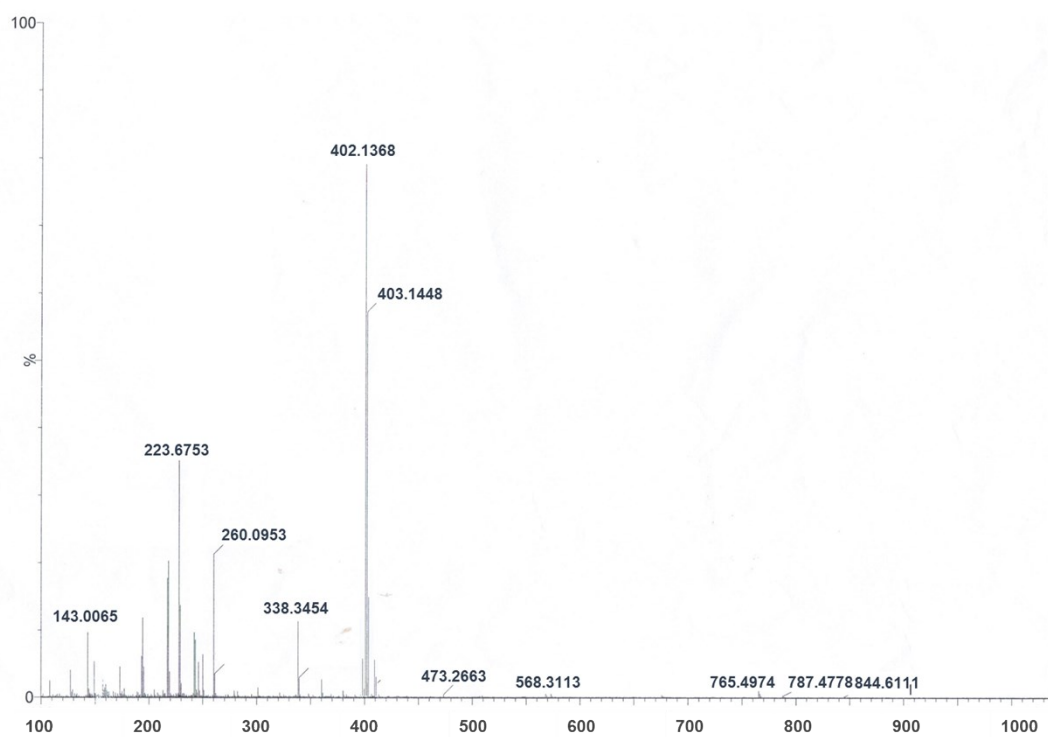

**Fig. S5** IR spectra of L-Cr<sup>3+</sup>.

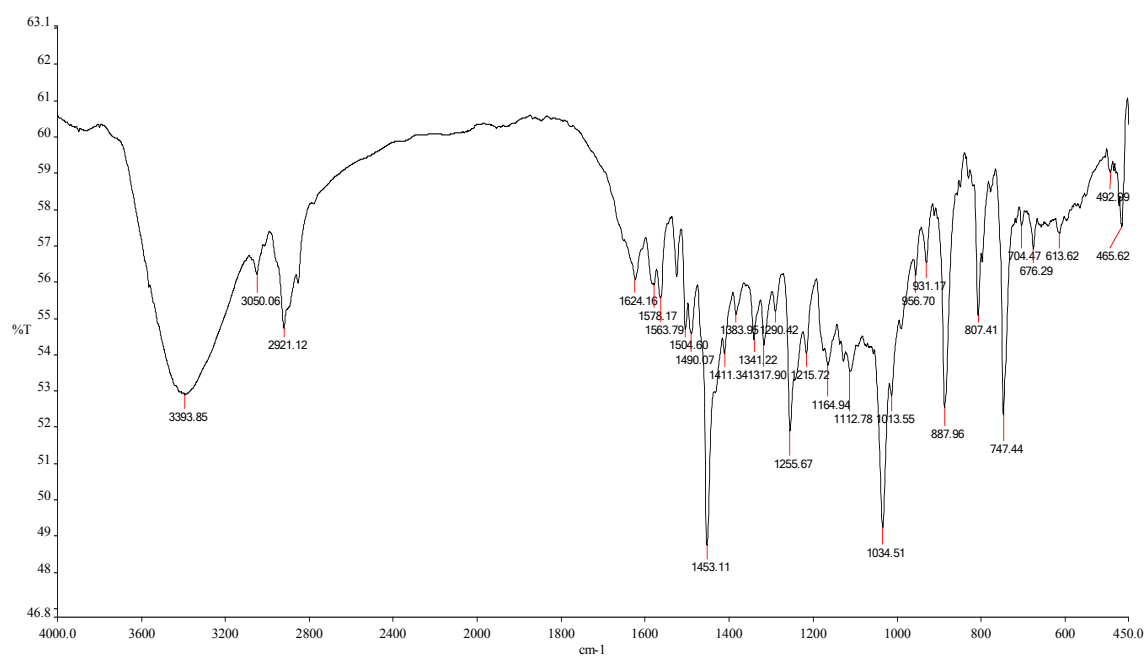

**Fig. S6** Mass Spectra of L-Cr<sup>3+</sup>.

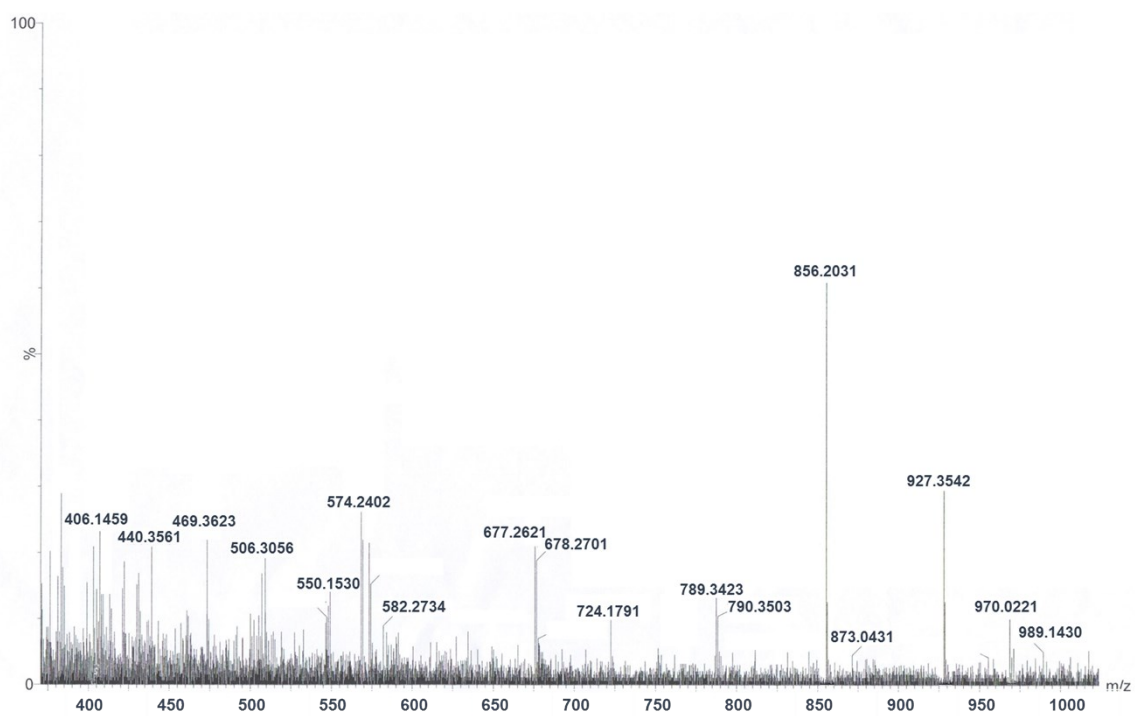

**Fig. S7** IR spectra of L-Al<sup>3+</sup>.

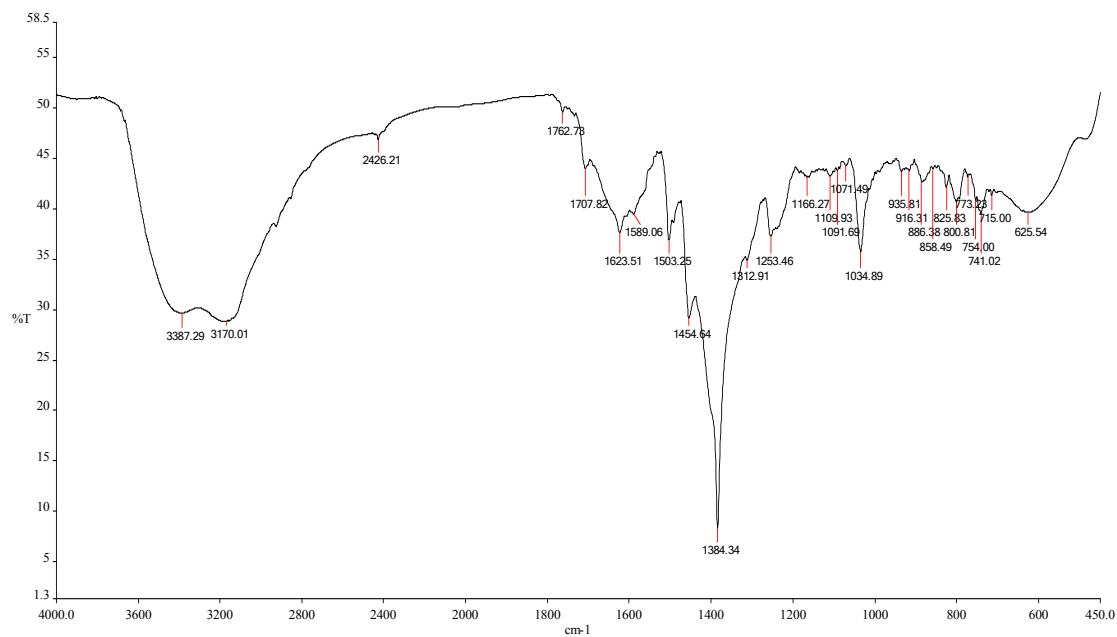

**Fig. S8** Mass Spectra of L-Al<sup>3+</sup>.

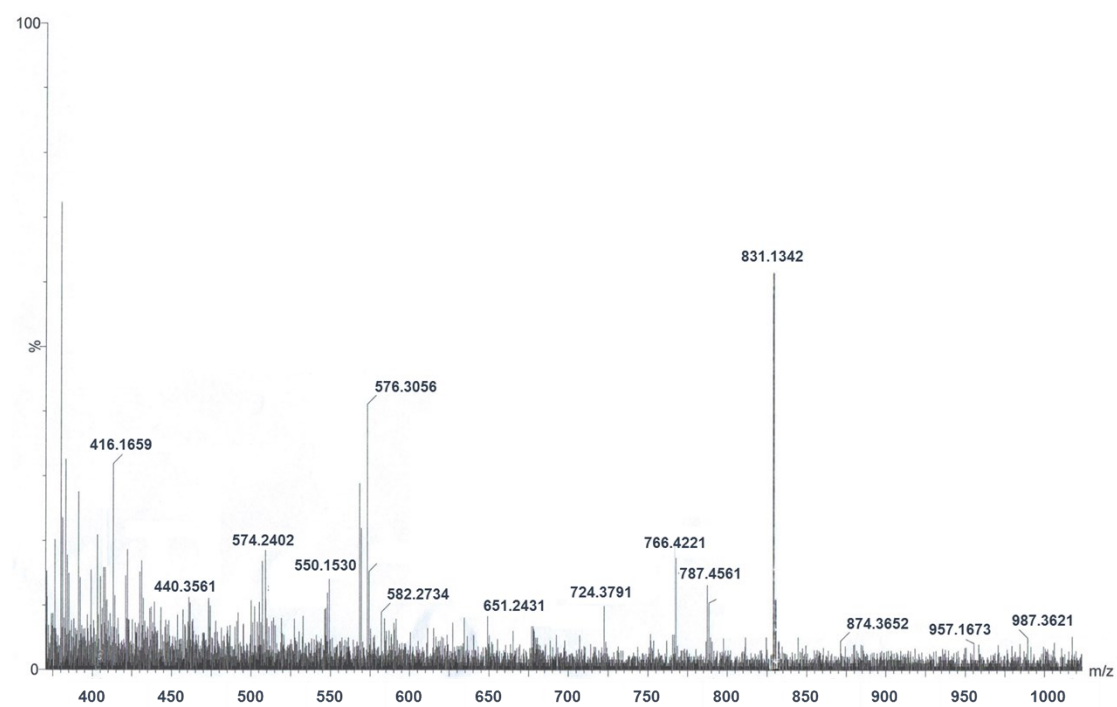

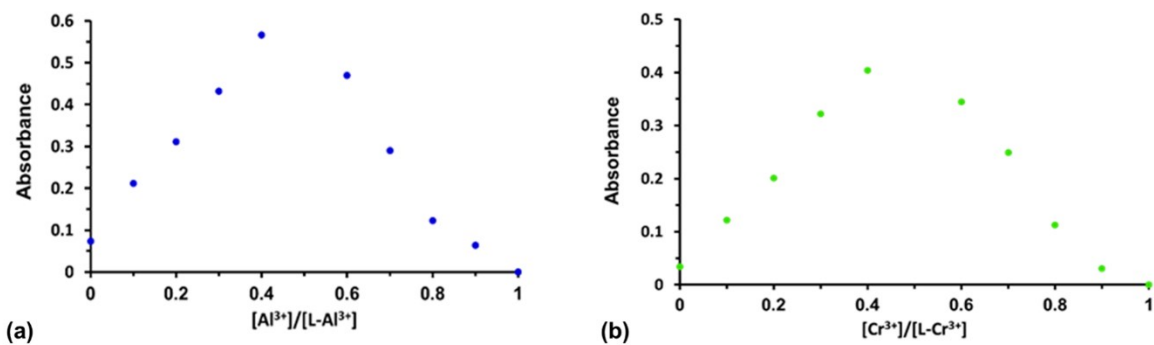

**Fig. S9** Job's plot of (a) L-Al<sup>3+</sup> (b) L-Cr<sup>3+</sup>.

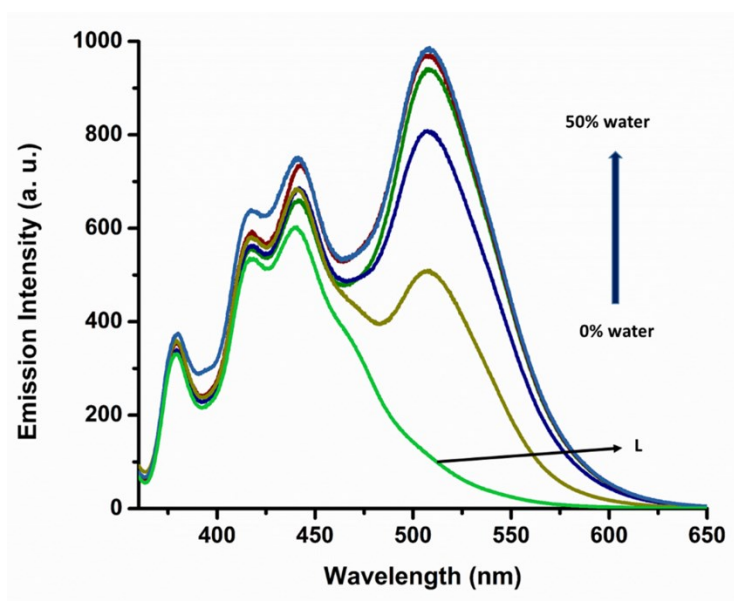

**Fig. S10** Effect of emission L upon addition of water (0.0-50.0% in DMSO).

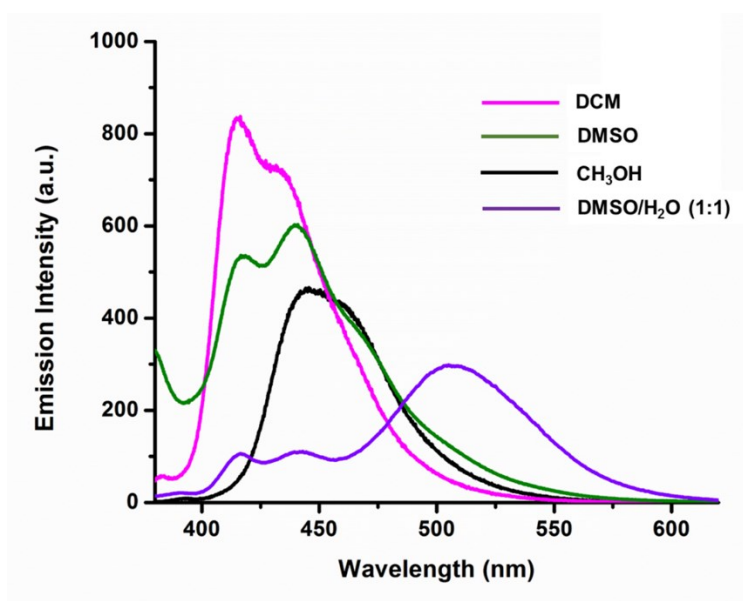

**Fig. S11** Solvent effects (DCM, DMSO, CH<sub>3</sub>OH, DMSO/H<sub>2</sub>O (1:1)) of L.

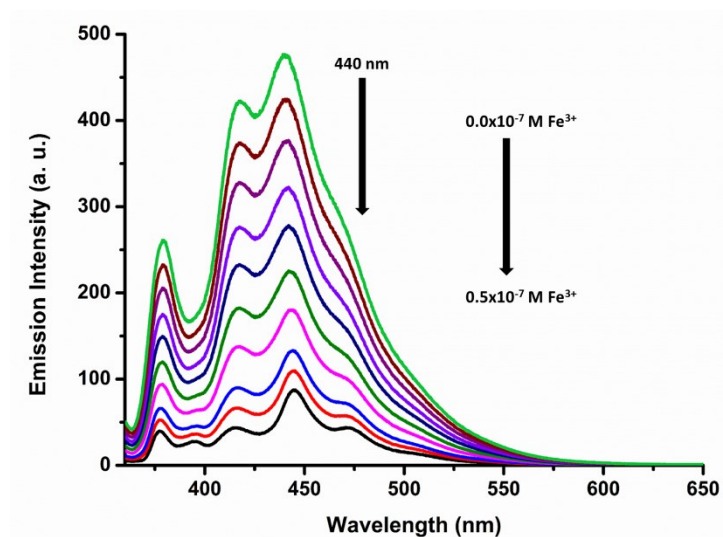

**Fig. S12** Fluorescence titration ( $\lambda_{\text{ex}}$ , 340.0 nm) of L ( $1.0 \times 10^{-7}$  M) upon addition of various amounts of (a)  $\text{Fe}^{3+}$  ions (0.5 equiv.) in DMSO.

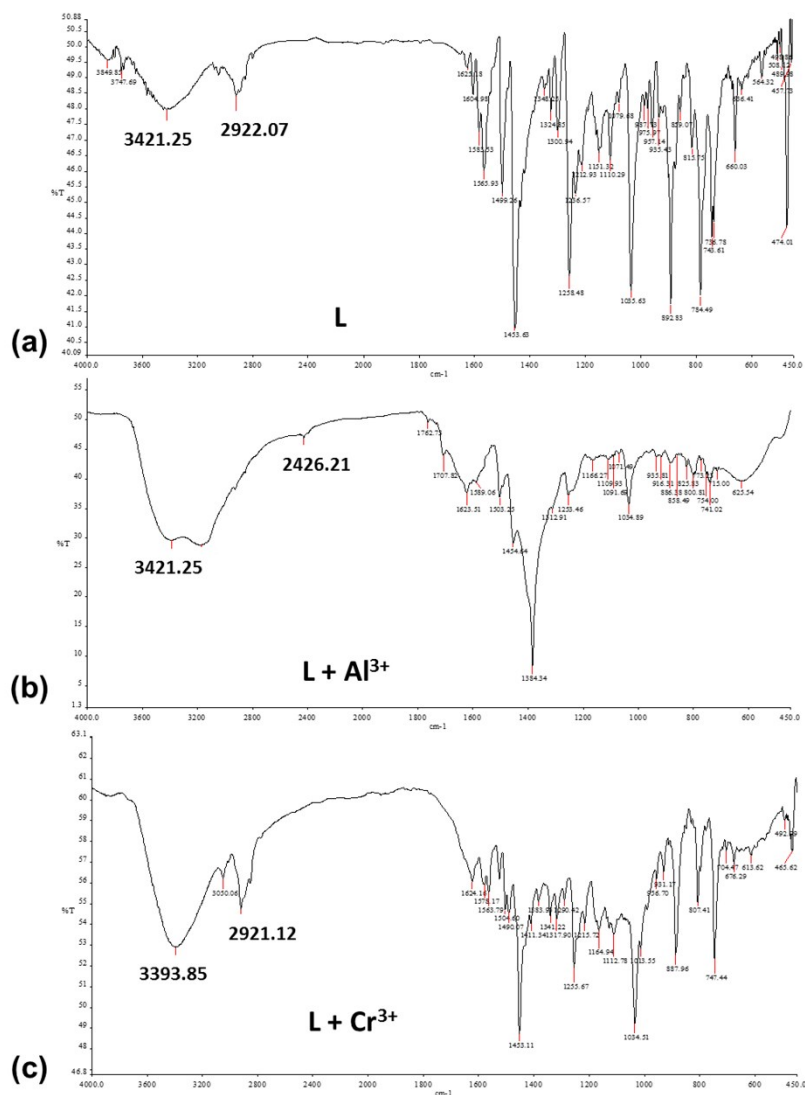

**Fig. S13** FTIR spectra of (a) L, (b)  $\text{L-Al}^{3+}$ , (c)  $\text{L-Cr}^{3+}$ .

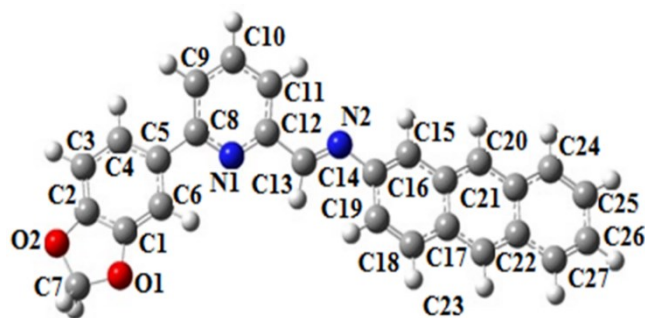

Fig. S14 Optimized structure of L.

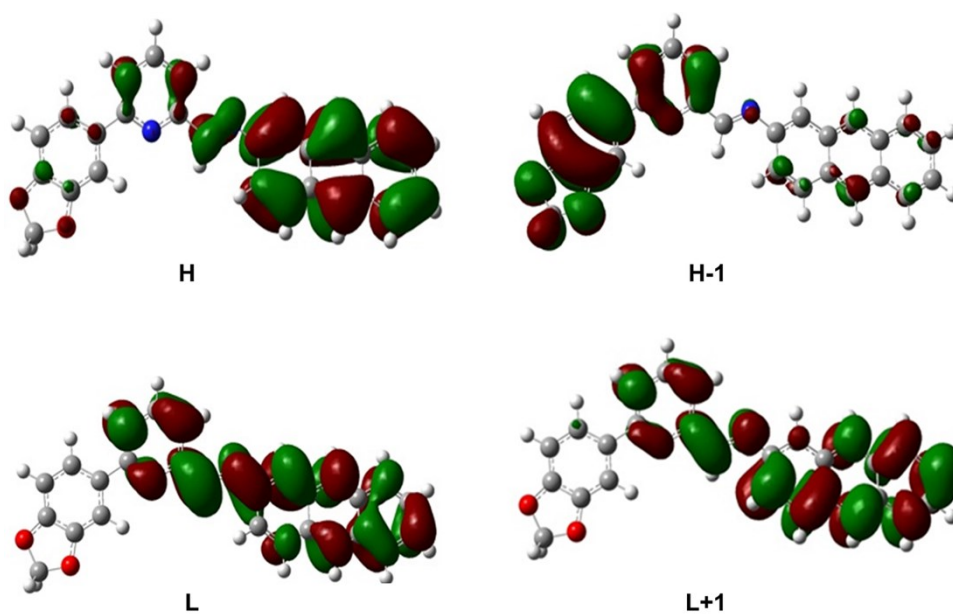

Fig. S15 Frontier molecular orbitals of L.

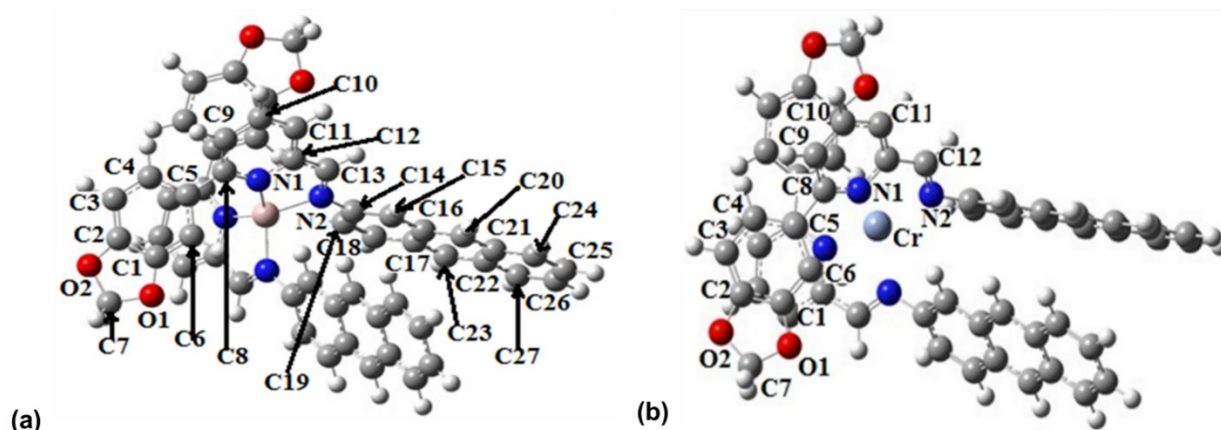

Fig. S16 Optimised structure of (a) L-Al<sup>3+</sup> and (b) L-Cr<sup>3+</sup>.



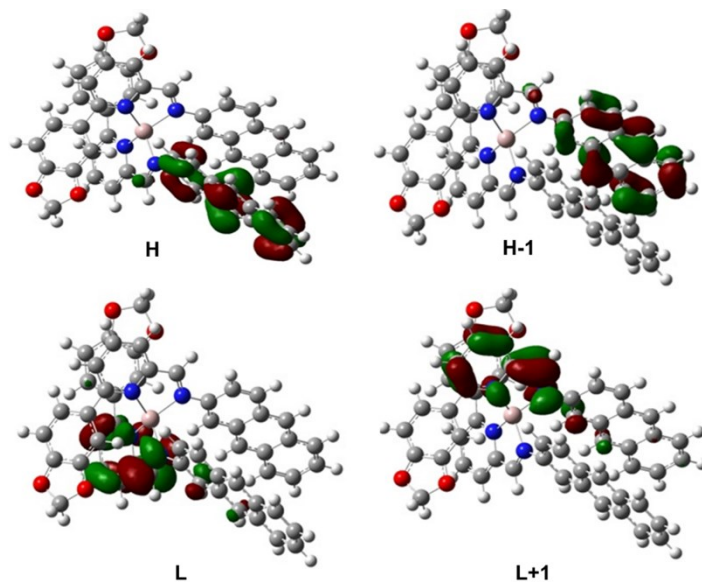

**Fig. S17** Frontier molecular orbitals of L-Al<sup>3+</sup>.

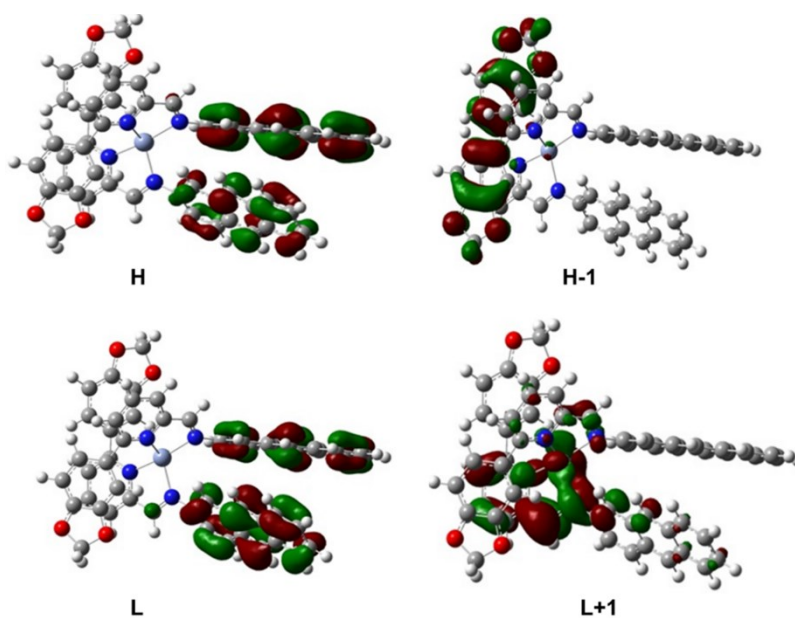

**Fig. S18** Frontier molecular orbitals of L-Cr<sup>3+</sup>.

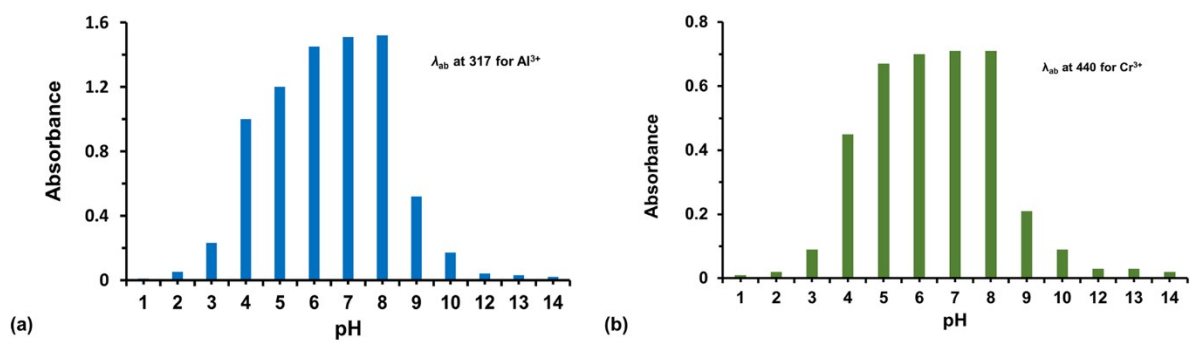

**Fig. S19** pH effects on absorbance values of (a) L-Al<sup>3+</sup> and (b) L-Cr<sup>3+</sup>.
