# Supplementary material for: Luminescence sensing, DFT, extraction and monitoring of Cr3+ and Al3+via the application of first derivative fluorescence spectroscopy
Source: Royal Society of Chemistry journal article supplement (doi:10.1039/d0nj01029d), 2020-01-01
Supplement: d0nj01029d2.pdf [file d0nj01029d2.pdf]

**SUPPLEMENTARY TABLE**

**Table S1** Classification, mechanism, application of various turn-on trivalent ( $\text{Al}^{3+}$ ,  $\text{Cr}^{3+}$ ,  $\text{Fe}^{3+}$ ) sensors.

| Sl. No. | Moiety                                                                                                                           | $\text{Al}^{3+}$ sensing                                                                        |                                                                                                                                    | $\text{Cr}^{3+}$ sensing                                                                        |                                                                                                                                    | $\text{Fe}^{3+}$ sensing                                                                        |                                                                                                                                    |                                                                            | Solvent                                                       | LOD ( $\text{Al}^{3+}$ ; $\text{Cr}^{3+}$ ; $\text{Fe}^{3+}$ )                                   | No. Steps for synthesis | Mechanism         | Applica-tion               | Ref |
|---------|----------------------------------------------------------------------------------------------------------------------------------|-------------------------------------------------------------------------------------------------|------------------------------------------------------------------------------------------------------------------------------------|-------------------------------------------------------------------------------------------------|------------------------------------------------------------------------------------------------------------------------------------|-------------------------------------------------------------------------------------------------|------------------------------------------------------------------------------------------------------------------------------------|----------------------------------------------------------------------------|---------------------------------------------------------------|--------------------------------------------------------------------------------------------------|-------------------------|-------------------|----------------------------|-----|
|         |                                                                                                                                  | Chromo-genic<br>$\lambda_{\text{abs(L)}} \text{ nm};$<br>$\lambda_{\text{abs(L+F)}} \text{ nm}$ | Fluoro-genic<br>$\lambda_{\text{ex}} \text{ nm};$<br>$\lambda_{\text{em(L)}} \text{ nm};$<br>$\lambda_{\text{em(L+F)}} \text{ nm}$ | Chromo-genic<br>$\lambda_{\text{abs(L)}} \text{ nm};$<br>$\lambda_{\text{abs(L+F)}} \text{ nm}$ | Fluoro-genic<br>$\lambda_{\text{ex}} \text{ nm};$<br>$\lambda_{\text{em(L)}} \text{ nm};$<br>$\lambda_{\text{em(L+F)}} \text{ nm}$ | Chromo-genic<br>$\lambda_{\text{abs(L)}} \text{ nm};$<br>$\lambda_{\text{abs(L+F)}} \text{ nm}$ | Fluoro-genic<br>$\lambda_{\text{ex}} \text{ nm};$<br>$\lambda_{\text{em(L)}} \text{ nm};$<br>$\lambda_{\text{em(L+F)}} \text{ nm}$ | $\Phi$<br>( $\text{Al}^{3+}$ ;<br>$\text{Cr}^{3+}$ ;<br>$\text{Fe}^{3+}$ ) |                                                               |                                                                                                  |                         |                   |                            |     |
| 1.      | Anthracene moiety<br>10-(2-((pyridin-2-yl)methylamino)methyl)phenol)methyl-anthracene                                            | 332, 348, 366, 386; 337, 358, 371, 391                                                          | 364; 411; 421                                                                                                                      | 332, 348, 366, 386; 337, 358, 371, 391                                                          | 364; 411; 421                                                                                                                      | 332, 348, 366, 386; 337, 358, 371, 391                                                          | 364; 411; 421                                                                                                                      | Very low                                                                   | MeOH                                                          | 2.4; 1.6; 0.6 $\mu\text{M}$                                                                      | 2                       | PET               | -                          | 12  |
| 2.      | Anthracene moiety<br>2-(Benzo[thiazol-2-yl]-4-bromo-3-((anthracen-9-ylmethylene)aminopropoxy)benzene                             | -                                                                                               | -                                                                                                                                  | 369, 383; 442                                                                                   | 380; 428; 576                                                                                                                      | 369, 383; 369, 442                                                                              | 380; 428; 576                                                                                                                      | -; 33 times; 24 times                                                      | MeCN                                                          | -; 0.46 $\mu\text{M}$ ; 0.45 $\mu\text{M}$                                                       | 4                       | PET               | -                          | 13  |
| 3.      | Anthracene moiety<br>Cu complex of anthracene based valine derivative                                                            | -                                                                                               | 365; fluores-cence increment                                                                                                       | -                                                                                               | 365; fluores-cence increment                                                                                                       | -                                                                                               | 365; fluores-cence increment                                                                                                       | -                                                                          | MeOH/<br>$\text{H}_2\text{O}$<br>(8:2, v/v)                   | -                                                                                                | -                       | PET inhibition    | -                          | 14  |
| 4.      | Naphthalimide moiety                                                                                                             | 409; 392                                                                                        | 530;530 (41 fold Increment)                                                                                                        | 409; 394                                                                                        | 530; 530 (30 fold increment)                                                                                                       | 409; 381                                                                                        | 530; 530 (50 fold increment)                                                                                                       | 0.016<br>0.67<br>0.47<br>0.80                                              | 9:1, v/v,<br>$\text{H}_2\text{O}$ ;<br>$\text{CH}_3\text{CN}$ | $3.6 \times 10^{-7}\text{M}$ ;<br>$3.8 \times 10^{-7}\text{M}$ ;<br>$3.5 \times 10^{-7}\text{M}$ | 2                       | PET inhibition    | Bio-imaging of HaCaT cells | 15  |
| 5.      | Pyrene moiety<br>2-((pyren-1-ylmethylene)amino)ethanol                                                                           | 355; 435                                                                                        | 395; 417; 500                                                                                                                      | 355; 435                                                                                        | 395; 417; 500                                                                                                                      | 355; 435                                                                                        | 395; 417; 500                                                                                                                      | 168; 180; 208 fold                                                         | $\text{CH}_3\text{CN}$                                        | $10^{-7} \text{ M}$                                                                              | 1                       | AIEEE             | Raw 264.7 cells            | 16  |
| 6.      | Pyrene moiety<br>(N <sub>1</sub> E,N <sub>3</sub> E)-N <sub>1</sub> ,N <sub>3</sub> -bis(pyren-1-ylmethylene)isophthalohydrazide | 379; 367                                                                                        | 379; 443; 527                                                                                                                      | 379, 369                                                                                        | 379; 443; 527                                                                                                                      | 379; 375                                                                                        | 379; 443; 527                                                                                                                      |                                                                            | DMSO:<br>HEPES<br>(8:2 in                                     | 2.88; 1.89; 3.00 $\mu\text{M}$                                                                   | 1                       | Excimer formation | HeLa cells                 | 17  |

|     |                                                                                                                                              |                                     |                                   |                                     |                                   |                                     |                                   |                                                                    |                                                               |                                                                                               |   |                             |                                                                                   |    |
|-----|----------------------------------------------------------------------------------------------------------------------------------------------|-------------------------------------|-----------------------------------|-------------------------------------|-----------------------------------|-------------------------------------|-----------------------------------|--------------------------------------------------------------------|---------------------------------------------------------------|-----------------------------------------------------------------------------------------------|---|-----------------------------|-----------------------------------------------------------------------------------|----|
| 7.  | Quinoline moiety                                                                                                                             | 296; 315                            | 296; 406; 413                     | 296; 315                            | 296; 406; 413                     | 296; 315                            | 296; 406; 413                     | 0.05; 0.29; 0.35; 0.26                                             | 100% Aqueous medium                                           | 2.10 $\mu$ M; 4.16 $\mu$ M; 2.09 $\mu$ M,                                                     | 2 | chelation                   | Bio-imaging in HeLa cells                                                         | 18 |
| 8.  | Quinoline moiety spirobenzopyran-quinoline (SBPQ)                                                                                            | 306, 362; 362, 440                  | 460; 552; 675 (88 fold Increment) | 306, 362; 362, 440                  | 460; 552; 675 (34 fold Increment) | 306, 362; 362, 440                  | 460; 552; 675 (40 fold Increment) | 0.01; 0.42; 0.18; 0.25                                             | CH <sub>3</sub> CN-HEPES buffer solution (1/1, v/v, pH = 7.4) | 3.24 $\times$ 10 <sup>-8</sup> M                                                              |   | ICT                         | Candida albicans cells, Tecoma stans pollen grains                                | 19 |
| 9.  | Rhodamine moiety naphthopyran-rhodamine 6G dyad                                                                                              | 471; 450-580                        | 516; non fluorescent; 556         | 471; 450-580                        | 516; non fluorescent; 556         | 471; 450-580                        | 516; non fluorescent; 556         | -; 0.08; 0.33; 0.37                                                | CH <sub>3</sub> OH                                            | 5.61 $\times$ 10 <sup>-7</sup> M                                                              | 2 |                             | Test paper                                                                        | 20 |
| 10. | Rhodamine moiety BODIPY-rhodamine                                                                                                            | 374, 499; 559                       | 374, 499; 559 (13 fold increment) | 374, 499; 559                       | 374, 499; 559 (12 fold increment) | 374, 499; 559                       | 374, 499; 559 (9 fold increment)  | I <sub>585</sub> /I <sub>517</sub> was increased by 13, 12, 9 fold | 1:1 CH <sub>3</sub> CN/0.01M Tris HCl buffer                  | -                                                                                             | 7 | bond energy transfer (TBET) | W138 (normal lung fibroblast cells)                                               | 21 |
| 11. | Rhodamine moiety                                                                                                                             | -; 555                              | 530; non fluorescent; 588         | -; 555                              | 530; non fluorescent; 588         | -; 555                              | 530; non fluorescent; 588         |                                                                    | CH <sub>3</sub> OH/H <sub>2</sub> O (8:2, v/v)                | 3.0 $\times$ 10 <sup>-3</sup> ; 3.0 $\times$ 10 <sup>-3</sup> ; 2.9 $\times$ 10 <sup>-3</sup> | 3 |                             | -                                                                                 | 22 |
| 12. | Rhodamine moiety N-(Rhodamine-B)lactam-ethylenediamine,[20-(2-aminoethyl)-3,6-bis(diethylamino)-10H-spiro[anthracene-9,10-isoindolin]-30-one | 330, 270; 561                       | 495; non fluorescent; 582         | 330, 270; 561                       | 495; non fluorescent; 582         | 330, 270; 561                       | 495; non fluorescent; 582         | 0.014; 0.34; 0.49; 0.24                                            | CH <sub>3</sub> OH/H <sub>2</sub> O, 1:1, v/v                 | -                                                                                             | 3 | FRET                        | Test paper strip                                                                  | 23 |
| 13. | Rhodamine moiety 2-(2-(5-bromo-2-hydroxybenzylideneamino)ethyl)-3',6'-bis(diethylamino)spiro[isindoline-1,9-xanthen]-3-one                   | No significant absorption band; 528 | 500; non-fluorescent; 552         | No significant absorption band; 528 | 500; non-fluorescent; 552         | No significant absorption band; 528 | 500; non-fluorescent; 552         | 0.008; 0.75; 0.36; 0.26                                            | CH <sub>3</sub> OH/H <sub>2</sub> O (7:3, v/v) (pH 7.2)       | 1.18; 1.80 and 4.04 nM                                                                        | 2 | Spiro-lactam ring opening   | 3 and 5 input advanced level logic gates, molecular keypad lock and memory device | 24 |

|     |                                                        |                                       |                                                      |                                       |                                                     |                                        |                                                     |                        |                                                              |                                                   |   |                           |                           |    |
|-----|--------------------------------------------------------|---------------------------------------|------------------------------------------------------|---------------------------------------|-----------------------------------------------------|----------------------------------------|-----------------------------------------------------|------------------------|--------------------------------------------------------------|---------------------------------------------------|---|---------------------------|---------------------------|----|
| 14. | Rhodamine moiety                                       | 240, 274, 317; 560                    | 350, 500; non-fluorescent; 583                       | 240, 274, 317; 560                    | 350, 500; non-fluorescent; 583                      | 240, 274, 317; 560                     | 350, 500; non-fluorescent; 583                      | 0.05; 0.28; 0.22; 0.71 | C <sub>2</sub> H <sub>5</sub> OH/H <sub>2</sub> O (1:1, v/v) | 1.17 μM; 3.16 μM; 2.50 μM                         | 2 | Spiro-lactam ring opening | -                         | 25 |
| 15. | Rhodamine moiety<br>Rhodamine p-chlorobenzaldehyde     | No significant absorption band; 550   | -; non-fluorescent; fluorescence between 560-590 nm  | No significant absorption band; 550   | -; non-fluorescent; fluorescence between 560-590 nm | No significant absorption band; 550    | -; non-fluorescent; fluorescence between 560-590 nm | -                      | Tris-HCl buffer solution (pH 7.4)                            | -; 8.64 μM; 10.5 μM                               | 2 | -                         | -                         | 26 |
| 16. | Rhodamine moiety<br>Rhodamine-naphthalimide dyad probe | 400, 540-580; 562 (18 fold increment) | 400; 532; 583                                        | 400, 540-580; 562 (20 fold increment) | 400; 532; 583                                       | 400, 540-580; 562 (126 fold increment) | 400; 532; 583                                       | -                      | 1:1 v/v 0.01M Tris HCl-CH <sub>3</sub> CN, pH 7.4.           | -                                                 | 7 | FRET                      | Bio-imaging in W138 cells | 27 |
| 17. | Rhodamine moiety                                       | 360; 556                              | 360; 566; 586                                        | 360; 556                              | 360; 566; 586                                       | -                                      | -                                                   | 0.0018; -; 0.0524;     | MeOH/H <sub>2</sub> O (4:1, v/v)                             | 3.6×10 <sup>-8</sup> M; 7.5×10 <sup>-8</sup> M; - | 4 | Spiro-lactam ring opening | Bio-imaging in A549 cells | 28 |
| 18. | Vaniline derivatives                                   | -                                     | 278; non fluorescent; 400-500 fluorescence increment | -                                     | 278; non fluorescent; 1500 fluorescence increment   | -                                      | 278; non fluorescent; 2500 fluorescence increment   | 0.21                   | -                                                            | -                                                 | - | -                         | -                         | 29 |
